# Supplementary material for: Conserved queen pheromones in bumblebees: a reply to Amsalem et al
Source: PeerJ. 2017 May 16;5:e3332. doi: 10.7717/peerj.3332 (PMC5436554; doi:10.7717/peerj.3332)
Supplement: Supplemental Information 4 — Raw data in a .csv file. [file peerj-05-3332-s004.csv]

cage_id	worker_type	treatment	colony_id	time_to_egglaying_days	brood_type	total_eggs	comments
1	naive	hexane	mix	5	larvae+eggs	17
3	naive	hexane	mix	11	no brood	0	eggs were never laid
5	naive	c25_high	mix		eggs	17	no data for latency
8	naive	hexane	mix	8	eggs	22
9	naive	c25_high	mix	8	eggs	32
10	naive	c25_low	mix	8	eggs	16
11	naive	c25_low	mix	9	eggs	8
12	naive	c25_low	mix	8	eggs	14
13	naive	c25_low	mix	8	eggs	9
14	naive	c25_high	mix	9	eggs	16
15	naive	hexane	mix	8	eggs	18
16	naive	hexane	mix	9	eggs	15
17	naive	hexane	mix	7	eggs	32
18	naive	c25_low	mix	9	eggs	9
19	naive	c25_high	mix	7	eggs	24
21	experienced	c25_high	a		eggs	2	no data for latency
22	experienced	c25_low	c	9	eggs	11
23	experienced	hexane	b	6	larvae+eggs	15
24	experienced	c25_high	a	11	no brood	0	eggs were never laid
25	experienced	c25_low	a	7	eggs	10
26	naive	hexane	mix	7	eggs	31
27	naive	c25_low	mix	9	eggs	4
28	naive	c25_high	mix	8	eggs	26
29	experienced	c25_low	a	5	larvae+eggs	27
30	naive	c25_high	mix	7	eggs	26
32	naive	c25_high	mix	6	larvae+eggs	21
33	naive	c25_high	mix	8	eggs	17
34	naive	c25_high	mix	8	eggs	15
35	naive	c25_low	mix	8	eggs	12
36	naive	hexane	mix	7	eggs	26
38	naive	c25_low	mix	9	eggs	17
39	naive	hexane	mix		eggs	17	no data for latency
40	experienced	c25_high	a	11	no brood	0	eggs were never laid
41	experienced	hexane	a	6	eggs	12
42	naive	c25_low	mix	7	eggs	15
43	naive	hexane	mix	8	eggs	15
44	naive	c25_low	mix	7	eggs	13
46	experienced	hexane	a	7	eggs	12
47	experienced	hexane	b	3	larvae+eggs	18
49	experienced	c25_low	a	7	eggs	6
50	experienced	c25_low	a	6	eggs	9
51	experienced	c25_high	a	10	eggs	2
52	experienced	c25_high	a	11	no brood	0	eggs were never laid
53	experienced	c25_high	a	7	eggs	19
54	experienced	c25_high	a	5	larvae+eggs	14
55	experienced	c25_low	a	7	eggs	16
56	experienced	hexane	a	6	eggs	15
57	naive	c25_low	mix	9	eggs	9
58	naive	hexane	mix	8	eggs	31
59	naive	hexane	mix	7	eggs	18
60	naive	hexane	mix	7	eggs	32
61	naive	c25_high	mix	7	eggs	15
62	naive	c25_high	mix	9	eggs	7
63	naive	c25_low	mix	9	eggs	9
64	experienced	c25_low	d	3	larvae+eggs	22
66	experienced	c25_low	a	6	eggs	29
67	experienced	c25_high	d	6	eggs	21
68	experienced	c25_high	a	6	eggs	5
69	experienced	c25_high	a	10	eggs	2
70	experienced	hexane	a	6	eggs	36
71	experienced	hexane	a	9	eggs	12
72	experienced	c25_high	d	11	no brood	0	eggs were never laid
73	naive	c25_high	mix	7	eggs	21
74	naive	c25_high	mix	8	eggs	23
75	experienced	c25_low	a	9	eggs	11
76	experienced	c25_low	a	4	larvae+eggs	14
77	experienced	hexane	a	5	larvae+eggs	37
78	experienced	c25_high	d	11	no brood	0	eggs were never laid
79	experienced	c25_high	a	8	eggs	20
80	experienced	c25_high	d	4	larvae+eggs	17
81	experienced	hexane	d	9	eggs	9
82	experienced	c25_low	b	4	larvae+eggs	19
83	experienced	c23_high	a	6	larvae	20
85	experienced	c23_high	a	7	eggs	19
86	experienced	c23_high	a	6	larvae+eggs	15
87	experienced	c23_high	a	6	larvae+eggs	26
88	experienced	c27_high	a	4	larvae+eggs	21
89	experienced	c27_high	a	6	eggs	13
90	experienced	c27_high	a	7	eggs	15
91	experienced	c27_high	a	7	eggs	22
92	experienced	c27_high	d	7	eggs	28
93	experienced	c27_high	d	7	eggs	25
94	experienced	c27_high	d	8	eggs	23
95	experienced	c23_high	d	6	eggs	24
96	experienced	c23_high	d	6	larvae+eggs	30
97	experienced	hexane	d	6	larvae+eggs	27
98	experienced	hexane	d	4	larvae+eggs	31
99	experienced	c27_high	a	8	eggs	15
100	experienced	c27_high	a	8	eggs	10
101	experienced	c27_high	a	11	no brood	0	eggs were never laid
102	experienced	c23_high	a	6	larvae+eggs	12
103	experienced	c23_high	a	6	eggs	18
104	experienced	c23_high	a	6	larvae+eggs	20
105	experienced	c23_high	a	7	eggs	21
106	experienced	hexane	a	7	eggs	15
107	experienced	hexane	a	7	eggs	8
108	experienced	hexane	g	4	larvae+eggs	11
109	experienced	hexane	f	4	larvae+eggs	11
110	experienced	hexane	f	5	larvae+eggs	29
111	experienced	hexane	f	5	larvae+eggs	7
112	experienced	hexane	e	2	larvae+eggs	35
113	experienced	hexane	g	6	eggs	1
114	experienced	hexane	g	4	larvae+eggs	14
115	experienced	hexane	g	4	larvae+eggs	7
116	experienced	hexane	g	4	larvae+eggs	9
117	experienced	c23_low	g	5	larvae+eggs	14
118	experienced	c23_low	g	5	larvae+eggs	7
119	experienced	c23_low	e	4	larvae+eggs	10
120	experienced	c23_low	f	8	eggs	7
121	experienced	c23_low	g	4	larvae+eggs	10
122	experienced	c23_low	g	3	larvae+eggs	13
123	experienced	c23_low	e	4	larvae+eggs	25
124	experienced	c23_low	e	6	larvae+eggs	20
125	naive	c23_low	mix	8	eggs	19
126	experienced	c23_high	f	10	eggs	3
127	experienced	c23_high	g	6	larvae+eggs	9
128	experienced	c23_high	g	4	larvae+eggs	19
129	experienced	c23_high	e	6	eggs	15
130	experienced	c23_high	e	4	larvae+eggs	24
131	experienced	c23_high	e	2	larvae+eggs	18
132	experienced	c23_high	e	5	larvae+eggs	21
133	experienced	c23_high	g	4	larvae+eggs	4
134	experienced	c23_high	g	8	eggs	16
135	experienced	c23_high	f	5	larvae+eggs	13
136	experienced	c27_low	f	4	larvae+eggs	13
137	experienced	c27_low	g	4	larvae+eggs	4
138	experienced	c27_low	g	4	larvae+eggs	23
139	experienced	c27_low	e	5	larvae+eggs	21
140	experienced	c27_low	e	5	larvae+eggs	33
141	experienced	c27_low	e	4	larvae+eggs	13
142	experienced	c27_low	e	2	larvae+eggs	18
143	experienced	c27_low	g	7	eggs	7
144	experienced	c27_low	g	2	larvae+eggs	43
145	experienced	c27_low	f	5	larvae+eggs	30
146	naive	c27_low	mix	8	eggs	21
147	experienced	c27_high	f	8	eggs	28
148	experienced	c27_high	g	2	larvae+eggs	6
149	experienced	c27_high	g	5	larvae+eggs	12
150	experienced	c27_high	e	4	larvae+eggs	14
151	experienced	c27_high	e	4	larvae+eggs	28
152	experienced	c27_high	e	6	eggs	13
153	experienced	c27_high	e	5	larvae+eggs	29
154	experienced	c27_high	g	11	no brood	0	eggs were never laid
155	experienced	c27_high	g	4	larvae+eggs	4
156	experienced	c27_high	f	11	no brood	0	eggs were never laid
157	naive	c27_high	mix	8	eggs	11
158	experienced	c25_low	f	6	eggs	5
159	experienced	c25_low	g	6	larvae+eggs	9
160	experienced	c25_low	g	8	eggs	2
161	experienced	c25_low	e	6	larvae+eggs	12
162	experienced	c25_low	e	2	larvae+eggs	15
163	experienced	c25_low	e	6	eggs	14
164	experienced	c25_low	g	4	larvae+eggs	14
165	experienced	c25_low	g	8	eggs	10
166	experienced	c25_high	f	7	eggs	14
167	experienced	c25_high	g	10	eggs	1
168	experienced	c25_high	g	11	no brood	0	eggs were never laid
169	experienced	c25_high	e	4	larvae+eggs	17
170	experienced	c25_high	e	6	eggs	14
171	experienced	c25_high	e	6	larvae+eggs	20
172	experienced	c25_high	e	2	larvae+eggs	29
173	experienced	c25_high	g	5	larvae+eggs	7
174	experienced	c25_high	f	7	eggs	12
175	naive	c27_low	mix	4	larvae+eggs	17
176	naive	c23_high	mix	9	eggs	4
177	naive	c27_high	mix	8	eggs	31
178	naive	c27_high	mix	8	eggs	14
179	naive	c23_high	mix	8	eggs	25
180	naive	c23_high	mix	9	eggs	20
181	naive	c27_low	mix	9	eggs	18
182	naive	hexane	mix	10	eggs	3
183	naive	c23_low	mix	8	eggs	14
184	naive	c23_low	mix	8	eggs	14
185	naive	c23_high	mix	8	eggs	14
186	naive	hexane	mix	8	eggs	8
187	naive	c27_low	mix	8	eggs	9
188	naive	c27_low	mix	8	eggs	17
189	naive	c27_high	mix	8	eggs	13
191	naive	c23_high	mix	8	eggs	18
192	naive	hexane	mix	9	eggs	12
193	naive	c23_high	mix	9	eggs	9
194	naive	c23_low	mix	11	no brood	0	eggs were never laid
195	naive	c27_high	mix	8	eggs	13
196	naive	c27_low	mix	8	eggs	14
197	naive	c27_high	mix	8	eggs	6
198	experienced	c23_low	e	9	eggs	19
199	experienced	c25_low	e	7	eggs	11
200	experienced	c25_low	g		eggs	7	no data for latency
201	experienced	hexane	g		eggs	4	no data for latency
202	experienced	c23_low	e	5	larvae+eggs	5
